# Supplementary material for: Theoretical insights into the catalytic mechanism of propylene hydroformylation over Co–N–C materials
Source: Royal Society of Chemistry journal article supplement (doi:10.1039/d3cp03486k), 2023-01-01
Supplement: d3cp03486k1.pdf [file d3cp03486k1.pdf]

## Supporting Information

### Theoretical insights into the catalytic mechanism of propylene hydroformylation over Co-N-C materials

*Yifei Chen,<sup>a, b, c</sup> Yanan Zhu,<sup>a, b, c</sup> Huaiqiang Dou,<sup>a, b, c</sup> Hao Gong<sup>a, b, c\*</sup>*

*<sup>a</sup> Key Laboratory for Green Chemical Technology of Ministry of Education, R&D*

*Center for Petrochemical Technology, Tianjin University, Tianjin 300072, China*

*<sup>b</sup> Zhejiang Institute of Tianjin University, Ningbo, Zhejiang, 315201, China*

*<sup>c</sup> State Key Laboratory of Engines, Tianjin University, Tianjin 300072, China*

---

\* Corresponding author at: Key Laboratory for Green Chemical Technology of the Ministry of Education, R&D  
Center for Petrochemical Technology, Tianjin University, Tianjin 300072, China.

*E-mail address:* [tjugonghao@tju.edu.cn](mailto:tjugonghao@tju.edu.cn).

## Section1.

Formula for product selectivity

$$N_i = A_i - B_i \quad (S1)$$

$$S_{propane} = \frac{N_{propane}}{N_{isobutyraldehyde} + N_{n-butyraldehyde} + N_{propane}} \quad (S2)$$

$$S_{aldehyde} = \frac{N_{n-butyraldehyde} + N_{isobutyraldehyd}}{N_{n-butyraldehyde} + N_{isobutyraldehyd} + N_{propane}} \quad (S3)$$

$$S_{n-butyraldehyde} = \frac{N_{n-butyraldehyde}}{N_{n-butyraldehyde} + N_{isobutyraldehyd} + N_{propane}} \quad (S4)$$

$$S_{isobutyraldehyde} = \frac{N_{isobutyraldehyd}}{N_{n-butyraldehyde} + N_{isobutyraldehyd} + N_{propane}} \quad (S5)$$

where  $N$  represents the actual occurrence frequency of species generated per unit time, the  $i$  represents propane, n-butyraldehyde, and isobutyraldehyde,  $A$  represents the total occurrence frequency for all reactions that generate the species, and  $B$  represents the occurrence frequency for all reactions that consume the species.

## Section2.

**Table S1** The activation energy of each elementary process of propylene hydroformylation.

| Serial<br>Number | elementary process                   | Activation barrier /eV |     |     |
|------------------|--------------------------------------|------------------------|-----|-----|
|                  |                                      | I                      | II  | III |
| 1                | $H_2 \rightleftharpoons H^* + H^*$   | 0                      | 0   | 0   |
| 2                | $H^* + * \rightleftharpoons * + H^*$ | \                      | 0.1 | 0.2 |

|    |                                                                                                                                   |      |      |      |
|----|-----------------------------------------------------------------------------------------------------------------------------------|------|------|------|
| 3  | $\text{CO} \rightleftharpoons \text{CO}^*$                                                                                        | 0    | 0    | 0    |
| 4  | $\text{CH}_3\text{CH}=\text{CH}_2 \rightleftharpoons \text{CH}_3\text{CH}=\text{CH}_2^*$                                          | 0    | 0    | 0    |
| 5  | $\text{CH}_3\text{CH}=\text{CH}_2^* + \text{H}^* \rightleftharpoons \text{CH}_3\text{CH}_2\text{CH}_2^*$                          | 0.33 | 0.58 | 0.49 |
| 6  | $\text{CH}_3\text{CH}_2\text{CH}_2^* \rightleftharpoons \text{CH}_3\text{CH}=\text{CH}_2^* + \text{H}^*$                          | 0.8  | 1.66 | 1.28 |
| 7  | $\text{CH}_3\text{CH}=\text{CH}_2^* + \text{H}^* \rightleftharpoons \text{CH}_3\text{CHCH}_3^*$                                   | 0.16 | 0.57 | 0.13 |
| 8  | $\text{CH}_3\text{CHCH}_3^* \rightleftharpoons \text{CH}_3\text{CH}=\text{CH}_2^* + \text{H}^*$                                   | 0.67 | 0.84 | 1.01 |
| 9  | $\text{CH}_3\text{CH}_2\text{CH}_2^* + \text{H}^* \rightleftharpoons \text{CH}_3\text{CH}_2\text{CH}_3^*$                         | 0.77 | 0.83 | 0.88 |
| 10 | $\text{CH}_3\text{CH}_2\text{CH}_3^* \rightleftharpoons \text{CH}_3\text{CH}_2\text{CH}_2^* + \text{H}^*$                         | 0.26 | 0.95 | 0.43 |
| 11 | $\text{CH}_3\text{CHCH}_3^* + \text{H}^* \rightleftharpoons \text{CH}_3\text{CH}_2\text{CH}_3^*$                                  | 0.66 | 0.86 | 0.72 |
| 12 | $\text{CH}_3\text{CH}_2\text{CH}_3^* \rightleftharpoons \text{CH}_3\text{CHCH}_3^* + \text{H}^*$                                  | 0.25 | 0.98 | 0.49 |
| 13 | $\text{CH}_3\text{CH}_2\text{CH}_2^* + \text{CO}^* \rightleftharpoons \text{CH}_3\text{CH}_2\text{CH}_2\text{CO}^*$               | 0.79 | 0.52 | 0.70 |
| 14 | $\text{CH}_3\text{CH}_2\text{CH}_2\text{CO}^* \rightleftharpoons \text{CH}_3\text{CH}_2\text{CH}_2^* + \text{CO}^*$               | 0.85 | 1.03 | 1.11 |
| 15 | $\text{CH}_3\text{CHCH}_3^* + \text{CO}^* \rightleftharpoons \text{CH}_3\text{CHCH}_3\text{CO}^*$                                 | 0.41 | 0.62 | 0.45 |
| 16 | $\text{CH}_3\text{CHCH}_3\text{CO}^* \rightleftharpoons \text{CH}_3\text{CHCH}_3^* + \text{CO}^*$                                 | 0.11 | 0.82 | 0.88 |
| 17 | $\text{CH}_3\text{CH}_2\text{CH}_2\text{CO}^* + \text{H}^* \rightleftharpoons$<br>$\text{CH}_3\text{CH}_2\text{CH}_2\text{CHO}^*$ | 0.42 | 0.72 | 0.95 |
| 18 | $\text{CH}_3\text{CH}_2\text{CH}_2\text{CHO}^* \rightleftharpoons \text{CH}_3\text{CH}_2\text{CH}_2\text{CO}^* +$<br>$\text{H}^*$ | 0.60 | 0.77 | 1.30 |
| 19 | $\text{CH}_3\text{CHCH}_3\text{CO}^* + \text{H}^* \rightleftharpoons \text{CH}_3\text{CHCH}_3\text{CHO}^*$                        | 0.59 | 0.70 | 1.01 |
| 20 | $\text{CH}_3\text{CHCH}_3\text{CHO}^* \rightleftharpoons \text{CH}_3\text{CHCH}_3\text{CO}^* + \text{H}^*$                        | 0.67 | 0.14 | 1.70 |
| 21 | $\text{H}^* + \text{H}^* \rightleftharpoons \text{H}_2$                                                                           | 0.75 | 0.95 | 0.55 |
| 22 | $\text{CO}^* \rightleftharpoons \text{CO}$                                                                                        | 2.11 | 2.72 | 1.07 |
| 23 | $\text{CH}_3\text{CH}=\text{CH}_2^* \rightleftharpoons \text{CH}_3\text{CH}=\text{CH}_2$                                          | 1.54 | 1.83 | 0.32 |
| 24 | $\text{CH}_3\text{CH}_2\text{CH}_2^* \rightleftharpoons \text{CH}_3\text{CH}_2\text{CH}_2$                                        | 3.24 | 2.36 | 2.28 |
| 25 | $\text{CH}_3\text{CHCH}_3^* \rightleftharpoons \text{CH}_3\text{CHCH}_3$                                                          | 3.04 | 2.16 | 2.10 |
| 26 | $\text{CH}_3\text{CH}_2\text{CH}_2\text{CO}^* \rightleftharpoons \text{CH}_3\text{CH}_2\text{CH}_2\text{CO}$                      | 3.35 | 2.76 | 2.34 |
| 27 | $\text{CH}_3\text{CHCH}_3\text{CO}^* \rightleftharpoons \text{CH}_3\text{CHCH}_3\text{CO}$                                        | 3.07 | 3.89 | 2.09 |
| 28 | $\text{CH}_3\text{CH}_2\text{CH}_3^* \rightleftharpoons \text{CH}_3\text{CH}_2\text{CH}_3$                                        | 1.62 | 1.85 | 0.77 |
| 29 | $\text{CH}_3\text{CH}_2\text{CH}_2\text{CHO}^* \rightleftharpoons \text{CH}_3\text{CH}_2\text{CH}_2\text{CHO}$                    | 1.86 | 1.16 | 0.93 |

\*I, II, and III in the table represent the three catalyst models of Co-N<sub>3</sub>-C, 0N-bridged and 2N-bridged, respectively.

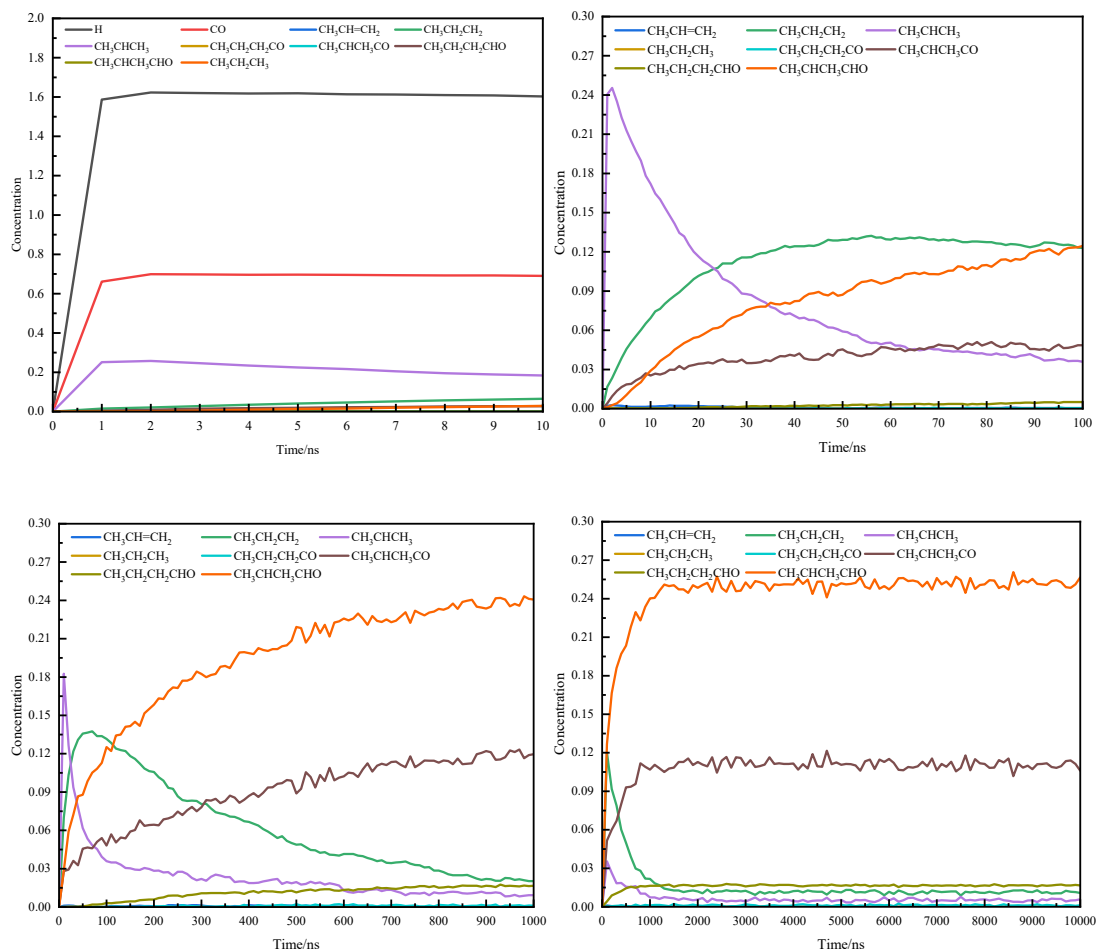

**Figure S1** The change of coverage over time within 10, 100, 1000 and 10000 ns on Co-N<sub>3</sub>-C

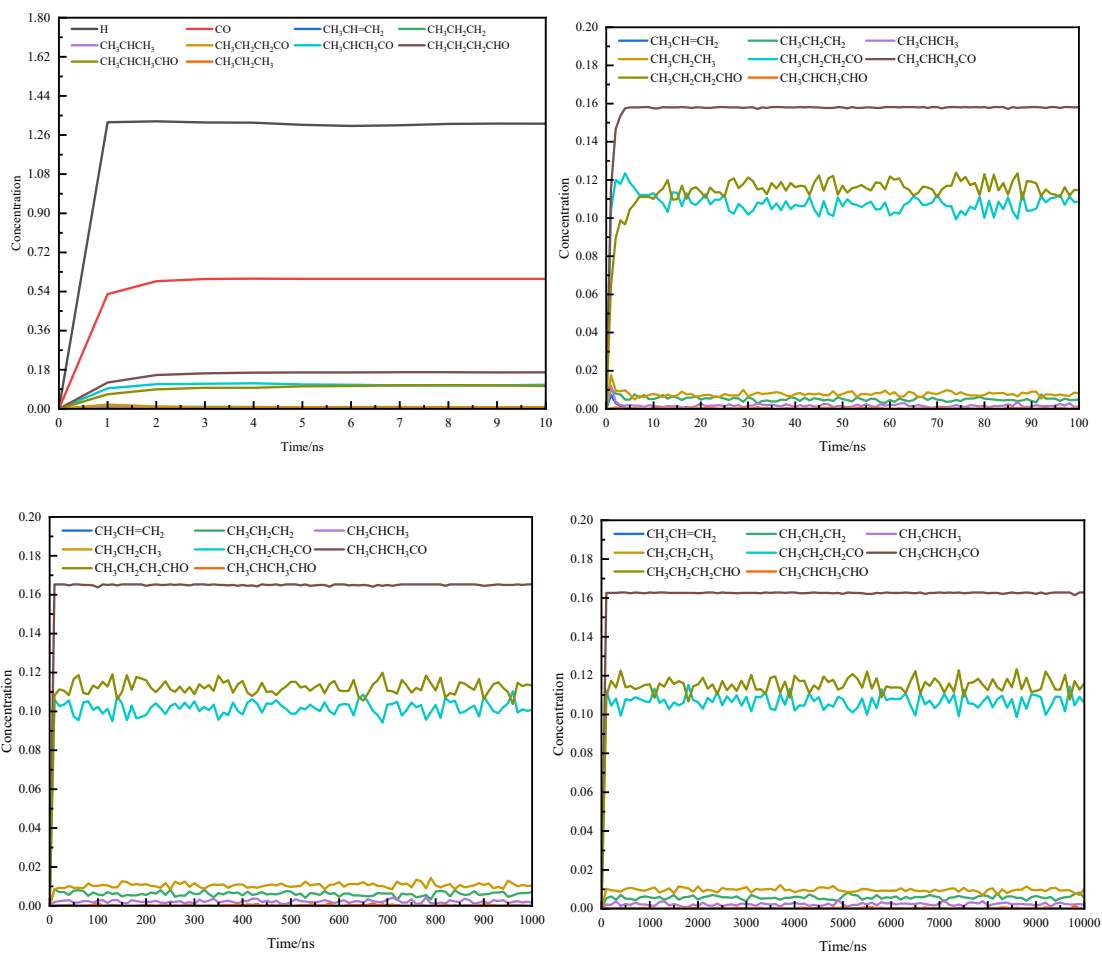

**Figure S2** The change of coverage over time within 10, 100, 1000 and 10000 ns on ON-bridged

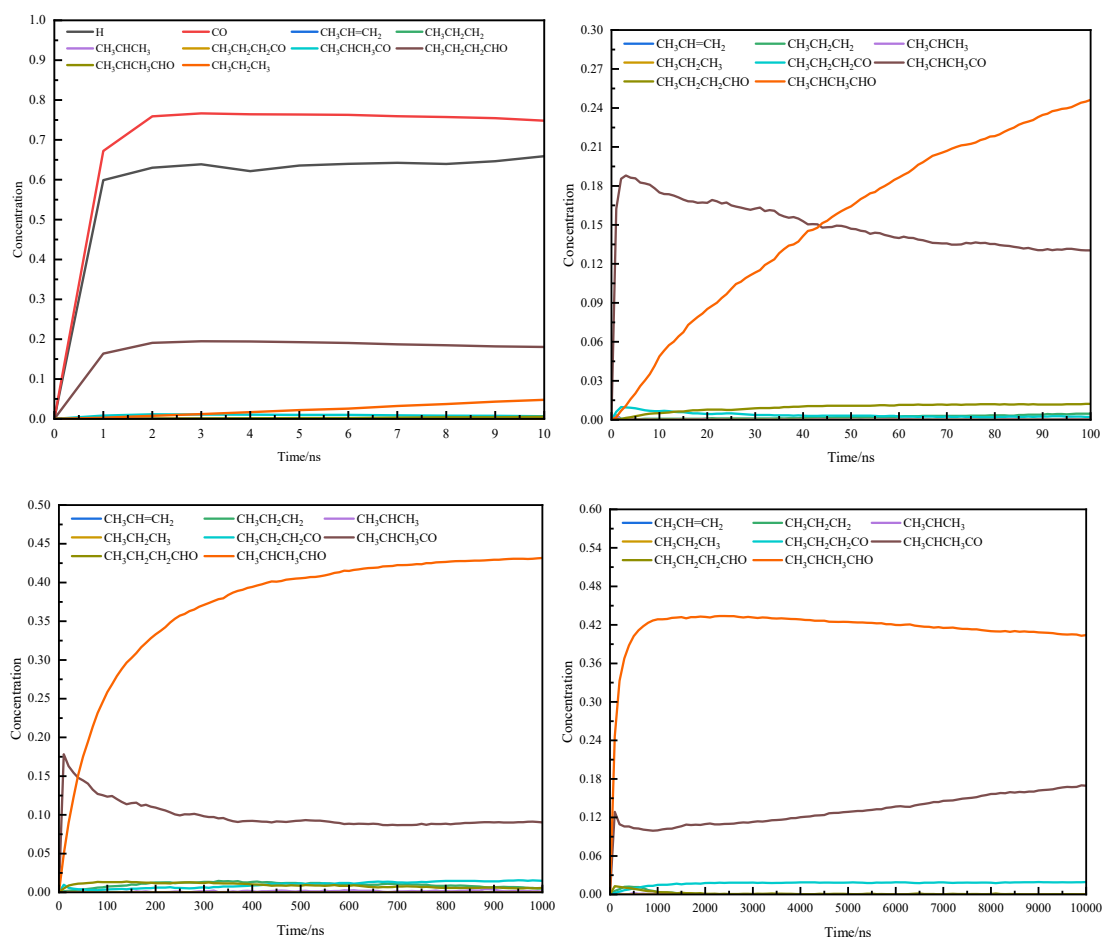

**Figure S3** The change of coverage over time within 10,100, 1000 and 10000 ns on 2N-bridged

**Table S2** The occurrence frequency of each elementary process in propylene hydroformylation on three models during 10000 ns simulation time.

| Serial Number | elementary process                                            | Activation barrier /eV |         |         |
|---------------|---------------------------------------------------------------|------------------------|---------|---------|
|               |                                                               | I                      | II      | III     |
| 1             | $H_2 \rightleftharpoons H^* + H^*$                            | 303289                 | 1529254 | 3547111 |
| 2             | $H^* + * \rightleftharpoons * + H^*$                          | \                      | 325373  | 1079617 |
| 3             | $CO \rightleftharpoons CO^*$                                  | 4028                   | 4033    | 404489  |
| 4             | $CH_3CH=CH_2 \rightleftharpoons CH_3CH=CH_2^*$                | 1626                   | 1672    | 164709  |
| 5             | $CH_3CH=CH_2^* + H^* \rightleftharpoons CH_3CH_2CH_2^*$       | 910                    | 8071    | 50      |
| 6             | $CH_3CH_2CH_2^* \rightleftharpoons CH_3CH=CH_2^* + H^*$       | 3433                   | 9       | 235     |
| 7             | $CH_3CH=CH_2^* + H^* \rightleftharpoons CH_3CHCH_3^*$         | 23517                  | 8921    | 4209    |
| 8             | $CH_3CHCH_3^* \rightleftharpoons CH_3CH=CH_2^* + H^*$         | 19368                  | 15311   | 1595    |
| 9             | $CH_3CH_2CH_2^* + H^* \rightleftharpoons CH_3CH_2CH_3^*$      | 3696                   | 29578   | 447     |
| 10            | $CH_3CH_2CH_3^* \rightleftharpoons CH_3CH_2CH_2^* + H^*$      | 6336                   | 22506   | 712     |
| 11            | $CH_3CHCH_3^* + H^* \rightleftharpoons CH_3CH_2CH_3^*$        | 10269                  | 9076    | 265     |
| 12            | $CH_3CH_2CH_3^* \rightleftharpoons CH_3CHCH_3^* + H^*$        | 7629                   | 16123   | 0       |
| 13            | $CH_3CH_2CH_2^* + CO^* \rightleftharpoons CH_3CH_2CH_2CO^*$   | 73                     | 1027    | 203     |
| 14            | $CH_3CH_2CH_2CO^* \rightleftharpoons CH_3CH_2CH_2^* + CO^*$   | 0                      | 64      | 124     |
| 15            | $CH_3CHCH_3^* + CO^* \rightleftharpoons CH_3CHCH_3CO^*$       | 623542                 | 1356    | 22176   |
| 16            | $CH_3CHCH_3CO^* \rightleftharpoons CH_3CHCH_3^* + CO^*$       | 622057                 | 710     | 19827   |
| 17            | $CH_3CH_2CH_2CO^* + H^* \rightleftharpoons CH_3CH_2CH_2CHO^*$ | 158389                 | 2260731 | 270     |
| 18            | $CH_3CH_2CH_2CHO^* \rightleftharpoons CH_3CH_2CH_2CO^* + H^*$ | 158321                 | 2260214 | 270     |
| 19            | $CH_3CHCH_3CO^* + H^* \rightleftharpoons CH_3CHCH_3CHO^*$     | 639722                 | 385517  | 2211    |

|    |                                                                                                                |        |         |         |
|----|----------------------------------------------------------------------------------------------------------------|--------|---------|---------|
| 20 | $\text{CH}_3\text{CHCH}_3\text{CHO}^* \rightleftharpoons \text{CH}_3\text{CHCH}_3\text{CO}^* + \text{H}^*$     | 638671 | 385516  | 556     |
| 21 | $\text{H}^* + \text{H}^* \rightleftharpoons \text{H}_2$                                                        | 299200 | 1525471 | 3543024 |
| 22 | $\text{CO}^* \rightleftharpoons \text{CO}$                                                                     | 0      | 0       | 400417  |
| 23 | $\text{CH}_3\text{CH}=\text{CH}_2^* \rightleftharpoons \text{CH}_3\text{CH}=\text{CH}_2$                       | 0      | 0       | 162280  |
| 24 | $\text{CH}_3\text{CH}_2\text{CH}_2^* \rightleftharpoons \text{CH}_3\text{CH}_2\text{CH}_2$                     | 0      | 0       | 0       |
| 25 | $\text{CH}_3\text{CHCH}_3^* \rightleftharpoons \text{CH}_3\text{CHCH}_3$                                       | 0      | 0       | 0       |
| 26 | $\text{CH}_3\text{CH}_2\text{CH}_2\text{CO}^* \rightleftharpoons \text{CH}_3\text{CH}_2\text{CH}_2\text{CO}$   | 0      | 0       | 0       |
| 27 | $\text{CH}_3\text{CHCH}_3\text{CO}^* \rightleftharpoons \text{CH}_3\text{CHCH}_3\text{CO}$                     | 0      | 0       | 0       |
| 28 | $\text{CH}_3\text{CH}_2\text{CH}_3^* \rightleftharpoons \text{CH}_3\text{CH}_2\text{CH}_3$                     | 0      | 0       | 0       |
| 29 | $\text{CH}_3\text{CH}_2\text{CH}_2\text{CHO}^* \rightleftharpoons \text{CH}_3\text{CH}_2\text{CH}_2\text{CHO}$ | 0      | 0       | 0       |
| 30 | $\text{CH}_3\text{CHCH}_3\text{CHO}^* \rightleftharpoons \text{CH}_3\text{CHCH}_3\text{CHO}^*$                 | 0      | 0       | 0       |

\*I, II, and III in the table represent the three catalyst models of Co-N<sub>3</sub>-C, 0N-bridged and 2N-bridged, respectively.

**Table S3** The product selectivity on three models

|                                  | Co-N <sub>3</sub> | 0N-bridged | 2N-bridged |
|----------------------------------|-------------------|------------|------------|
| S <sub>propane</sub> /%          | 0                 | 4.6        | 0          |
| S <sub>aldehyde</sub> /%         | 100               | 95.4       | 100        |
| S <sub>n-butyraldehyde</sub> /%  | 6.1               | 95.2       | 0          |
| S <sub>isobutyraldehyde</sub> /% | 93.9              | 0.2        | 100        |
